# Supplementary material
Source: MDPI journal article supplement (https://www.mdpi.com/2075-5309/12/5/675)
Supplement: s1 [file s1]

## Supplementary 1

**Table S1.** Technical parameters of concrete damming thresholds on the Rgilewka River.

| No. | River course [km] | Year of construction | Construction material | Width [m] | Height [m] | Range of effect [m <sup>2</sup> ] |
|-----|-------------------|----------------------|-----------------------|-----------|------------|-----------------------------------|
| 1   | 17 + 225          | 1972                 | concrete              | 2.6       | 0,4        | ~819                              |
| 2   | 25 + 790          | 1972                 | concrete              | ~2.6      | 0,4        | ~1149                             |
| 3   | 30 + 545          | 1972                 | concrete              | ~2.0      | 0,4        | ~1146                             |
| 4   | 31 + 118          | 1972                 | concrete              | ~2.0      | 0,4        | ~1164                             |
| 5   | 31 + 700          | 1972                 | concrete              | ~2.0      | 0,4        | ~600                              |
| 6   | 32 + 974          | 1972                 | concrete              | ~2.0      | 0,4        | ~776                              |

## Supplementary 2

**Table S2.** Technical parameters of weirs on the Rgilewka River. Bold font signifies weirs analyzed in the paper-covered with reconstruction in the recent period.

| No. | Year of construction | Structure                | Width of weir [m]          | Maximum water level [m] | Water level for agricultural purposes [m] | Crest ordinate = MinPP [m a.s.l.] | NPP = MaxPP [m a.s.l.] | Range of backwater [km] | Channel retention [km <sup>3</sup> ] | Range of direct effect [ha] | Range of indirect effect [ha] |
|-----|----------------------|--------------------------|----------------------------|-------------------------|-------------------------------------------|-----------------------------------|------------------------|-------------------------|--------------------------------------|-----------------------------|-------------------------------|
| 1   | 2014                 | Weir reinforced concrete | 12.0 (3.0×3.0×3.0×3.0)     | 1.3                     | 0.81                                      | 91.65                             | 92.95                  | 2.078                   | 19.3                                 | 6.5                         | 70                            |
| 2   | 2014                 | Weir reinforced concrete | 10.0 (2.0×2.0×2.0×2.0×2.0) | 2.0                     | 1.99                                      | 93.25                             | 95.25                  | 2.471                   | 29.6                                 | 9.9                         | 64                            |
| 3   | 2018                 | Weir reinforced concrete | 10.0 (3.0×4.0×3.0)         | 1.10                    | ---                                       | 94.80                             | 95.90                  | 1.774                   | 10.9                                 | 9.7                         | 120                           |
| 4   | 2020/2021            | Weir reinforced concrete | 10.0 (3.0×4.0×3.0)         | 1.15                    | ---                                       | 96.00                             | 97.15                  | 1.16                    | 5.3                                  | 2.7                         | 55                            |
| 5   | 2020/2021            | Weir reinforced concrete | 10.0 (3.0×4.0×3.0)         | 1.36                    | ---                                       | 96.9                              | 98.26                  | 1.328                   | 5.4                                  | 3.5                         | 70                            |
| 6   | 2020/2021            | Weir reinforced concrete | 10.0 (3.0×4.0×3.0)         | 1.04                    | ---                                       | 98.40                             | 9.44                   | 1.187                   | 3.7                                  | 2.7                         | 45                            |
| 7   | 2020/2021            | Weir reinforced concrete | 10.0 (3.0×4.0×3.0)         | 1.10                    | ---                                       | 100.35                            | 101.45                 | 1.088                   | 3.6                                  | 3.0                         | 42                            |

|   |           |                                |                    |      |     |        |        |       |     |     |    |
|---|-----------|--------------------------------|--------------------|------|-----|--------|--------|-------|-----|-----|----|
| 8 | 2020/2021 | Weir<br>reinforced<br>concrete | 10.0 (3.0×4.0×3.0) | 0.85 | --- | 102.75 | 103.60 | 0.873 | 2.2 | 1.9 | 34 |
| 9 | 2020/2021 | Weir<br>reinforced<br>concrete | 10.0 (3.0×4.0×3.0) | 1.45 | --- | 104.90 | 106.35 | 1.193 | 5.2 | 2.6 | 38 |

---
